# Supplementary material
Source: PubMed Central journal article supplement (PMC6214455)
Supplement: NIHMS989264-supplement-Supplemental_Tables.pdf [file NIHMS989264-supplement-Supplemental_Tables.pdf]

**Table S1. Prediction performances of the subjective value.**

|                            | Rank     | Explanatory variables                              | Performance   |
|----------------------------|----------|----------------------------------------------------|---------------|
| <i>Linear regression</i>   | <b>1</b> | <b>fat, carbohydrate, protein, vitamin</b>         | <b>0.481</b>  |
|                            | 2        | fat, sodium, carbohydrate, protein, vitamin        | 0.478         |
|                            | 3        | fat, sodium, protein, vitamin                      | 0.474         |
|                            | 4        | fat, protein, vitamin                              | 0.465         |
|                            | 5        | sodium, carbohydrate, protein, vitamin             | 0.463         |
|                            | 6        | fat, sodium, sugar, protein, vitamin               | 0.455         |
|                            | 7        | fat, carbohydrate, sugar, protein, vitamin         | 0.455         |
|                            | 8        | carbohydrate, protein, vitamin                     | 0.453         |
|                            | 9        | fat, sodium, carbohydrate, sugar, protein, vitamin | 0.452         |
|                            | 10       | fat, sugar, protein, vitamin                       | 0.440         |
| <i>Logistic regression</i> | <b>1</b> | <b>fat, carbohydrate, protein, vitamin</b>         | <b>69.95%</b> |
|                            | 2        | fat, sodium, carbohydrate, protein, vitamin        | 69.64%        |
|                            | 3        | sodium, carbohydrate, protein, vitamin             | 69.26%        |
|                            | 4        | fat, protein, vitamin                              | 69.10%        |
|                            | 5        | fat, sodium, protein, vitamin                      | 68.94%        |
|                            | 6        | fat, sodium, carbohydrate, protein                 | 68.79%        |
|                            | 7        | sodium, protein, vitamin                           | 68.79%        |
|                            | 8        | carbohydrate, protein, vitamin                     | 68.79%        |
|                            | 9        | fat, sodium, carbohydrate, sugar, protein          | 68.48%        |
|                            | 10       | sodium, carbohydrate, sugar, protein, vitamin      | 68.25%        |

Prediction performances of the best 10 models are shown for linear and logistic regression analyses (the best model in each analysis is shown in bold). Performance, z-transformed correlation between the predicted and the actual values for the linear regression analysis, and prediction accuracy for the logistic regression analysis. See Methods for details.

**Table S2. Food items used**

---

|                                                  |                                         |
|--------------------------------------------------|-----------------------------------------|
| 1. 3 Musketeers <sup>d</sup>                     | 29. Sun Chips <sup>e</sup>              |
| 2. Barnum's Animal Crackers <sup>d</sup>         | 30. Dole Mixed Fruit <sup>a</sup>       |
| 3. Doritos Nacho Cheese <sup>e</sup>             | 31. Grapefruit <sup>a</sup>             |
| 4. Chips Ahoy! <sup>d</sup>                      | 32. Banana Chips <sup>e</sup>           |
| 5. Kit Kat <sup>d</sup>                          | 33. Dark Chocolate Bananas <sup>d</sup> |
| 6. Pop-Tarts Brown Sugar Cinnamon <sup>d</sup>   | 34. Crispy Apple <sup>e</sup>           |
| 7. Pop-Tarts Frosted Strawberry <sup>d</sup>     | 35. Vegetable Chips <sup>e</sup>        |
| 8. Hostess Powdered Donettes <sup>d</sup>        | 36. Sweet Potato Chips <sup>e</sup>     |
| 9. Twix Cookie Bars <sup>d</sup>                 | 37. Chopped Salad Chicken <sup>c</sup>  |
| 10. Hershey's Whatchamacallit Candy <sup>d</sup> | 38. Mexicali Salad <sup>c</sup>         |
| 11. Apple Pie <sup>d</sup>                       | 39. Caesar Salad <sup>c</sup>           |
| 12. Avocado <sup>a</sup>                         | 40. Veggie Wrap <sup>c</sup>            |
| 13. Blackberries <sup>a</sup>                    | 41. Super Burrito <sup>c</sup>          |
| 14. Cauliflower <sup>a</sup>                     | 42. Chocolate & Berry <sup>d</sup>      |
| 15. Ritz Crackers'n Cheese Dip <sup>e</sup>      | 43. Green Beans Chips <sup>e</sup>      |
| 16. Cherry Pie <sup>d</sup>                      | 44. Salami <sup>b</sup>                 |
| 17. Chocolate Muffins <sup>d</sup>               | 45. Smoked Turkey <sup>b</sup>          |
| 18. Hostess Donettes <sup>d</sup>                | 46. American Cheese <sup>b</sup>        |
| 19. Granny Smith Apple <sup>a</sup>              | 47. Chicken & Roasted Beet <sup>c</sup> |
| 20. Green Grapes <sup>a</sup>                    | 48. Mozzarella Cheese <sup>b</sup>      |
| 21. Mango <sup>a</sup>                           | 49. Roast Beef <sup>b</sup>             |
| 22. Milano Cookies <sup>d</sup>                  | 50. Caprese Sandwich <sup>c</sup>       |
| 23. Orange <sup>a</sup>                          | 51. Tuna Salad Wrap <sup>c</sup>        |
| 24. Raspberries <sup>a</sup>                     | 52. Smoked Salmon <sup>b</sup>          |
| 25. Red Velvet Cake <sup>d</sup>                 | 53. Plain Yogurt <sup>b</sup>           |
| 26. Quaker Chewy Granola Bar <sup>d</sup>        | 54. Strawberry Yogurt <sup>b</sup>      |
| 27. Starburst Candy <sup>d</sup>                 | 55. Blueberry Yogurt <sup>b</sup>       |
| 28. Strawberry <sup>a</sup>                      | 56. Deviled Eggs <sup>b</sup>           |

---

<sup>a</sup> fresh vegetables and fruits (e.g., Orange and Apple), <sup>b</sup> meet and dairy products (e.g., salami and yogurt), <sup>c</sup> cooked products (e.g., salad and wrap), <sup>d</sup> sweet snacks (e.g., chocolate bar and cake), and <sup>e</sup> salty snacks (e.g., chips and crackers).
